# Supplementary material
Source: HighWire-hosted journal article supplement (http://www.ajnr.org/highwire/filestream/96401/field_highwire_adjunct_files/0/1011.pdf)
Supplement: 1011.pdf [file 1011.pdf]

**Table 1 Patient characteristics of children with and without brain injury.**

|                                          | No brain injury (n=153)                                | Brain injury (n=72)                                    |
|------------------------------------------|--------------------------------------------------------|--------------------------------------------------------|
| <i>Prenatal characteristics</i>          |                                                        |                                                        |
| Parental education level                 |                                                        |                                                        |
| Low                                      | 25 (16%)                                               | 15 (21%)                                               |
| Middle                                   | 45 (29%)                                               | 22 (31%)                                               |
| High                                     | 71 (46%), unknown 12 (8%)                              | 30 (42%), unknown 5 (7%)                               |
| Multiplet pregnancy                      | 22 (14%)                                               | 8 (11%)                                                |
| Antenatal steroids                       | 144 (94%), unknown 1 (0.7%)                            | 63 (88%), unknown 1 (1%)                               |
| <i>Infant characteristics</i>            |                                                        |                                                        |
| Ethnicity                                |                                                        |                                                        |
| Western                                  | 105 (69%)                                              | 49 (68%)                                               |
| Non-Western                              | 47 (31%), unknown 1 (0.7%)                             | 23 (32%)                                               |
| Female sex                               | 54 (35%)                                               | 35 (49%)                                               |
| GA at birth (weeks <sup>days</sup> )     | 27 <sup>+5</sup> [26 <sup>+2</sup> ;28 <sup>+5</sup> ] | 26 <sup>+6</sup> [26 <sup>+1</sup> ;28 <sup>+0</sup> ] |
| Birth weight (grams)                     | 996 [813;1255]                                         | 960 [808;1119]                                         |
| Birth weight Z-score (SD)                | -0.1 [-0.8;0.7]                                        | -0.1 [-1.0;0.6]                                        |
| Apgar 5min (0-10)                        | 8 [7;9], unknown 1 (0.7%)                              | 8 [7;9], unknown 1 (1%)                                |
| IRDS, treated                            | 100 (65%), unknown 1 (0.7%)                            | 42 (58%)                                               |
| Endotracheal intubation                  | 107 (70%)                                              | 50 (69%)                                               |
| Days on mechanical ventilation           | 2 [0;11]                                               | 3 [0;17]                                               |
| Postnatal steroid therapy                | 26 (17%), unknown 1 (0.7%)                             | 12 (17%), unknown 1 (1%)                               |
| BPD, of which:                           | 47 (45%)                                               | 38 (53%)                                               |
| Mild                                     | 71 (31%)                                               | 25 (35%)                                               |
| Severe                                   | 22 (14%)                                               | 13 (18%)                                               |
| PDA, treated                             | 59 (39%)                                               | 25 (35%)                                               |
| Use of inotropics                        | 15 (10%)                                               | 13 (18%)                                               |
| NEC                                      | 8 (5%)                                                 | 5 (7%)                                                 |
| Culture proven sepsis                    | 63 (41%)                                               | 24 (33%)                                               |
| IVH, of which:                           | 0 (0%)                                                 | 54 (75%)                                               |
| Grade I                                  | 0 (0%)                                                 | 28 (39%)                                               |
| Grade II                                 | 0 (0%)                                                 | 25 (35%)                                               |
| Grade II+                                | 0 (0%)                                                 | 1 (1%)                                                 |
| PVL                                      | 0 (0%)                                                 | 6 (8%)                                                 |
| Stroke                                   | 0 (0%)                                                 | 13 (18%), unknown 2 (3%)                               |
| Cerebellar bleeding                      | 0 (0%)                                                 | 8 (11%)                                                |
| ROP, of which:                           | 63 (41%)                                               | 30 (42%), unknown 1 (1%)                               |
| Grade I                                  | 50 (33%)                                               | 19 (26%)                                               |
| Grade II                                 | 8 (5%)                                                 | 3 (4%)                                                 |
| Grade III/IV                             | 5 (3%)                                                 | 8 (11%)                                                |
| Duration of NICU-stay (days)             | 31 [17;58]                                             | 33 [21;65]                                             |
| GA at NICU transfer to level-II hospital | 32 <sup>+1</sup> [30 <sup>+3</sup> ;34 <sup>+4</sup> ] | 31 <sup>+5</sup> [30 <sup>+3</sup> ;35 <sup>+1</sup> ] |

Data are shown as median [interquartile range] or absolute numbers (percentage).

n = number of patients, GA = gestational age, IRDS = infant respiratory distress syndrome treated with surfactant, BPD = bronchopulmonary dysplasia, PDA = persistent ductus arteriosus treated medically or surgically, NEC = necrotizing enterocolitis  $\geq$  stage 2, IVH = intraventricular hemorrhage, PVL = periventricular leukomalacia, ROP = retinopathy of prematurity, NICU = neonatal intensive care unit.

**Table 2. Brain measurements from birth until 2 months corrected age in children with and without brain injury**

| <b>No brain injury (n=153)</b>   |                            |                     |                 |                     |                      |                     |                 |                     |
|----------------------------------|----------------------------|---------------------|-----------------|---------------------|----------------------|---------------------|-----------------|---------------------|
| <b>Length (mm)</b>               | <b>Birth</b>               |                     | <b>GA 29wks</b> |                     | <b>NICU transfer</b> |                     | <b>2M-visit</b> |                     |
|                                  | <b>n</b>                   | <b>Median (IQR)</b> | <b>n</b>        | <b>Median (IQR)</b> | <b>n</b>             | <b>Median (IQR)</b> | <b>n</b>        | <b>Median (IQR)</b> |
| <b>Corpus callosum</b>           | 115                        | 36.5 [33.4;39.1]    | 126             | 38.2 [36.4;39.7]    | 82                   | 40.5 [39.0;42.2]    | 72              | 52.8 [49.3;55.4]    |
| <b>Corpus callosum-fastigium</b> | 116                        | 40.1 [38.5;42.3]    | 122             | 41.4 [40.0;43.0]    | 78                   | 43.9 [42.6;45.4]    | 70              | 56.8 [55.1;58.4]    |
| <b>Head circumference</b>        | 150                        | 250 [235;265]       | 117             | 257 [242;265]       | 82                   | 274 [265;283]       | 69              | 389 [375;400]       |
| <b>Growth (mm/wk)</b>            | <b>Birth-NICU transfer</b> |                     |                 |                     | <b>Birth-2M</b>      |                     |                 |                     |
|                                  | <b>n</b>                   | <b>Median (IQR)</b> |                 | <b>n</b>            | <b>Median (IQR)</b>  |                     |                 |                     |
| <b>Corpus callosum</b>           | 76                         | 1.11 [0.83;1.37]    |                 | 65                  | 0.79 [0.66;0.88]     |                     |                 |                     |
| <b>Corpus callosum-fastigium</b> | 74                         | 0.90 [0.61;1.13]    |                 | 61                  | 0.80 [0.74;0.89]     |                     |                 |                     |
| <b>Head circumference</b>        | 71                         | 5.39 [3.28;7.00]    |                 | 68                  | 6.92 [6.24;7.35]     |                     |                 |                     |
| <b>Brain injury (n=72)</b>       |                            |                     |                 |                     |                      |                     |                 |                     |
| <b>Length (mm)</b>               | <b>Birth</b>               |                     | <b>GA 29wks</b> |                     | <b>NICU transfer</b> |                     | <b>2M-visit</b> |                     |
|                                  | <b>n</b>                   | <b>Median (IQR)</b> | <b>n</b>        | <b>Median (IQR)</b> | <b>n</b>             | <b>Median (IQR)</b> | <b>n</b>        | <b>Median (IQR)</b> |
| <b>Corpus callosum</b>           | 53                         | 34.4 [33.1;36.8]    | 54              | 37.5 [35.1;38.8]    | 38                   | 40.2 [38.2;43.3]    | 29              | 51.6 [50.0;54.0]    |
| <b>Corpus callosum-fastigium</b> | 52                         | 39.0 [37.1;40.9]    | 58              | 41.0 [39.9;42.6]    | 36                   | 43.86[41.4;46.1]    | 27              | 56.8 [54.1;58.5]    |
| <b>Head circumference</b>        | 71                         | 246 [235;258]       | 56              | 252 [243;262]       | 34                   | 271 [259;284]       | 28              | 385 [366;395]       |
| <b>Growth (mm/wk)</b>            | <b>Birth-NICU transfer</b> |                     |                 |                     | <b>Birth-2M</b>      |                     |                 |                     |
|                                  | <b>n</b>                   | <b>Median (IQR)</b> |                 | <b>n</b>            | <b>Median (IQR)</b>  |                     |                 |                     |
| <b>Corpus callosum</b>           | 41                         | 1.19 [0.96;1.36]    |                 | 27                  | 0.80 [0.65;0.89]     |                     |                 |                     |
| <b>Corpus callosum-fastigium</b> | 34                         | 1.01 [0.73;1.36]    |                 | 24                  | 0.83 [0.73;0.91]     |                     |                 |                     |
| <b>Head circumference</b>        | 32                         | 5.84 [4.44;6.76]    |                 | 27                  | 6.59 [6.01;7.05]     |                     |                 |                     |

n = number of patients/measurements, GA = gestational age, wk = week, NICU = neonatal intensive care unit, M = month, IQR = interquartile range.

Table 3. Associations between length and growth of CC, CCF and HC, and neurodevelopmental outcomes at 2 years in children without brain injury (n=153)

| CC                               | Cognition |                          | Motor |                          | Language |                             | Behavior |                    |
|----------------------------------|-----------|--------------------------|-------|--------------------------|----------|-----------------------------|----------|--------------------|
|                                  | n         | B (CI)                   | n     | B (CI)                   | n        | B (CI)                      | n        | B (CI)             |
| <u>Length (per 5 mm)</u>         |           |                          |       |                          |          |                             |          |                    |
| Birth                            | 107       | 1.54 (-4.01;7.09)        | 94    | <b>5.87 (0.38;11.36)</b> | 105      | 5.49 (-1.51;12.48)          | 104      | -0.65 (-5.29;3.99) |
| GA 29wks                         | 116       | 2.37 (-2.49;7.24)        | 96    | 4.89 (-0.31;10.08)       | 114      | 2.81(-3.81;9.42)            | 115      | 0.15 (-3.89;4.19)  |
| NICU-transfer                    | 75        | -1.13 (-7.36;5.10)       | 64    | 2.32 (-3.70;8.35)        | 74       | 0.31 (-7.29;7.89)           | 73       | -1.48 (-6.17;3.21) |
| 2M-visit                         | 68        | <b>5.93 (2.75;9.11)</b>  | 62    | <b>4.64 (1.32;7.96)</b>  | 68       | <b>6.48 (2.01;10.95)</b>    | 68       | -1.96 (-4.70;0.78) |
| <u>Growth (per 0.25 mm/wk)</u>   |           |                          |       |                          |          |                             |          |                    |
| Birth-NICU transfer              | 72        | 0.07 (-1.39;1.53)        | 61    | -0.96 (-2.50;0.59)       | 70       | 0.00 (-2.04;2.04)           | 71       | -0.80 (-1.99;0.40) |
| Birth-2M                         | 61        | <b>5.11 (0.88;9.35)</b>  | 56    | <b>4.52 (0.14;8.90)</b>  | 61       | 3.83 (-2.20;9.86)           | 61       | -2.46 (-6.07;1.15) |
| CCF                              | Cognition |                          | Motor |                          | Language |                             | Behavior |                    |
|                                  | n         | B (CI)                   | n     | B (CI)                   | n        | B (CI)                      | n        | B (CI)             |
| <u>Length (per 5 mm)</u>         |           |                          |       |                          |          |                             |          |                    |
| Birth                            | 107       | -3.71 (-9.88;2.46)       | 94    | 1.51 (-4.77;7.79)        | 105      | -2.18 (-10.08;5.72)         | 104      | -0.24 (-5.43;4.95) |
| GA 29wks                         | 113       | -2.13 (-7.80;3.54)       | 94    | -3.39 (-9.48;2.70)       | 111      | -3.08 (-10.72;4.56)         | 112      | 0.72 (-3.97;5.40)  |
| NICU-transfer                    | 72        | -1.47 (-9.68;6.74)       | 61    | -2.57 (-10.52;5.37)      | 72       | 1.67 (-8.09;11.44)          | 71       | 0.31 (-5.79;6.40)  |
| 2M-visit                         | 66        | <b>9.08 (2.38;15.78)</b> | 60    | 0.04 (-7.14;7.22)        | 66       | 8.42 (-0.95;17.79)          | 66       | -1.53 (-7.14;4.07) |
| <u>Growth (per 0.25 mm/wk)</u>   |           |                          |       |                          |          |                             |          |                    |
| Birth-NICU transfer              | 69        | -0.15 (-1.71;1.42)       | 58    | -0.29 (-1.97;1.40)       | 68       | 0.52 (-1.65;2.68)           | 69       | 0.44 (-0.85;1.72)  |
| Birth-2M                         | 57        | 5.52 (-0.27;11.30)       | 52    | 1.85 (-4.28;7.98)        | 57       | 6.45 (-1.57;14.46)          | 57       | -2.70 (-7.56;2.17) |
| HC                               | Cognition |                          | Motor |                          | Language |                             | Behavior |                    |
|                                  | n         | B (CI)                   | n     | B (CI)                   | n        | B (CI)                      | n        | B (CI)             |
| <u>Circumference (per 20 mm)</u> |           |                          |       |                          |          |                             |          |                    |
| Birth                            | 138       | 1.87 (-2.57;6.31)        | 117   | 0.39 (-4.35;5.12)        | 135      | -1.84 (-8.01;4.33)          | 135      | 1.06 (-2.64;4.76)  |
| GA 29wks                         | 110       | -3.36 (-6.87;0.14)       | 92    | -1.93 (-5.91;2.06)       | 107      | <b>-6.47 (-11.45;-1.50)</b> | 108      | 0.23 (-2.84;3.31)  |
| NICU-transfer                    | 77        | 1.56 (-4.85;7.96)        | 65    | 0.42 (-6.01;6.85)        | 76       | -1.57 (-9.40;6.26)          | 75       | -2.74 (-7.51;2.04) |
| 2M-visit                         | 66        | <b>7.22 (2.87;11.57)</b> | 60    | 3.62 (-1.06;8.30)        | 66       | <b>8.72 (2.73;14.72)</b>    | 66       | -0.51 (-4.25;3.23) |
| <u>Growth (per 1 mm/wk)</u>      |           |                          |       |                          |          |                             |          |                    |
| Birth-NICU transfer              | 67        | 0.21 (-0.89;1.32)        | 56    | 0.06 (-1.12;1.23)        | 66       | -0.13 (-1.64;1.37)          | 66       | -0.53 (-1.42;0.36) |
| Birth-2M                         | 65        | 2.56 (-1.09;6.21)        | 59    | 1.37 (-2.43;5.17)        | 65       | <b>5.81 (0.94;10.66)</b>    | 65       | -1.49 (-4.51;1.53) |

Beta-coefficients (B) are shown per interquartile range of each marker, followed by 95% confidence intervals (CI). Significant associations are depicted in **bold**. Neurodevelopmental outcomes were based on the cognitive and total motor score of the Bayley Scales of Infant and Toddler Development-Third edition (for cognition and motor outcome, respectively), Lexi-list (language) and total score of the Child Behavior Checklist (behavior). Models were adjusted for sex (female 0, male 1), gestational age at birth (weeks), birth weight Z-score and combined parental education (low/middle/high). Apart from these four covariates, the GA29wks and 2M-visit models were also adjusted for gestational age or corrected age at measurement, respectively. Results from similar analyses on infants with brain injury are shown in supplemental Table S6.

CC = corpus callosum, n = number of patients/ultrasounds included, GA = gestational age, NICU = neonatal intensive care, M = months, CCF = corpus callosum-fastigium, HC = head circumference.

**Table 4. Added value of CC length, CCF length and/or HC at 2M-visit for prediction of neurodevelopmental outcome at 2 years in children without brain injury.**

| N=72             | <u>Basic neonatal model</u> |              | <u>Neonatal + HC model</u> |       | <u>Neonatal + CC model</u> |              | <u>Neonatal + CCF model</u> |       | <u>Neonatal + HC + CC model</u> |              | <u>Neonatal + HC + CC + CCF model</u> |       |
|------------------|-----------------------------|--------------|----------------------------|-------|----------------------------|--------------|-----------------------------|-------|---------------------------------|--------------|---------------------------------------|-------|
|                  | R <sup>2</sup>              | P            | ΔR <sup>2</sup>            | ΔP    | ΔR <sup>2</sup>            | ΔP           | ΔR <sup>2</sup>             | ΔP    | ΔR <sup>2</sup>                 | ΔP           | ΔR <sup>2</sup>                       | ΔP    |
| <b>Cognition</b> | 11.8                        | <b>0.040</b> | +1.4                       | 0.248 | <b>+9.8</b>                | <b>0.013</b> | +2.2                        | 0.108 | <b>+8.8</b>                     | <b>0.036</b> | +6.2                                  | 0.108 |
| <b>Motor</b>     | 6.6                         | 0.155        | -0.8                       | 0.450 | +6.5                       | 0.083        | -3.0                        | 0.846 | +4.1                            | 0.170        | +2.7                                  | 0.271 |
| <b>Language</b>  | 8.4                         | 0.085        | +3.5                       | 0.128 | <b>+8.9</b>                | <b>0.015</b> | -1.5                        | 0.571 | <b>+9.8</b>                     | <b>0.029</b> | +7.1                                  | 0.092 |

Explanatory value (adjusted R<sup>2</sup>, as percentage) per outcome using the ‘basic neonatal’ model with only neonatal risk factors (sex, GA at birth, combined parental education level, BPD grade, treated PDA, and total days of hospital admission), and the difference in R<sup>2</sup> (ΔR<sup>2</sup>) when CC length at 2 months, CCF length at 2 months, HC at 2 months, or a combination of those, are added to this model (all adjusted for CA at ultrasound). Significance levels (P) are given for R<sup>2</sup> of the ‘basic neonatal model’, as well as for the increase in explanatory value (ΔP) when brain growth markers are added. Neurodevelopmental outcomes were based on cognitive and total motor score of the Bayley Scales of Infant and Toddler Development-Third edition (for cognition and motor outcome, respectively) and the Lexi-list (language).

GA = gestational age, BPD = bronchopulmonary dysplasia, PDA = patent ductus arteriosus, CC = corpus callosum, CCF = corpus callosum-fastigium length, HC = head circumference, CA = corrected age.

**Supplemental Figure S1. Flowchart of the study population.**

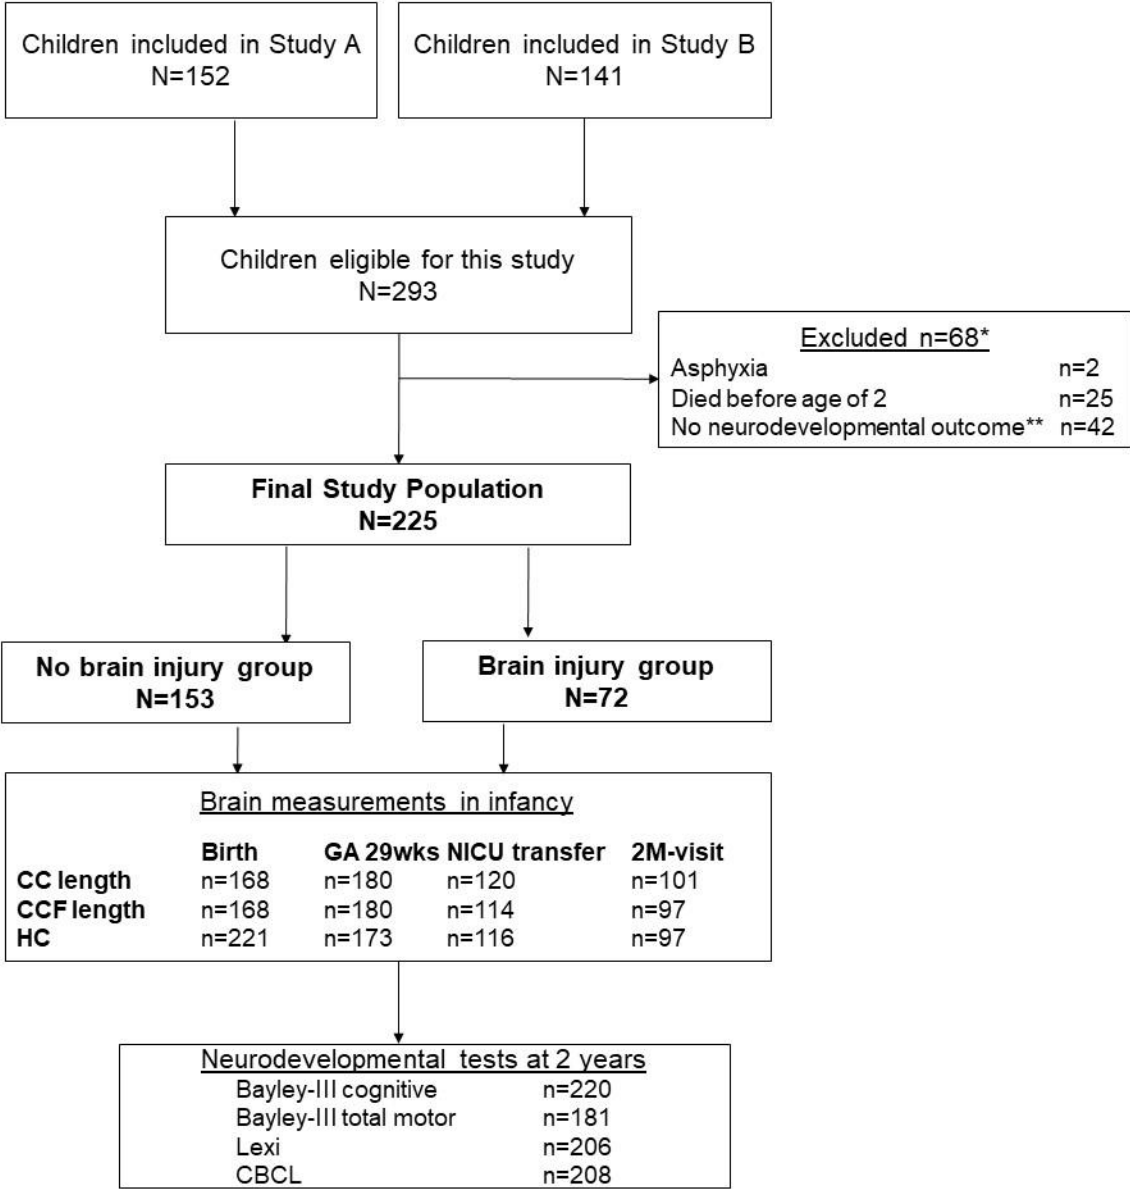

\* Numbers per reason of exclusion exceed total number of children excluded as some children were excluded for multiple reasons. \*\* Possible reasons for absent neurodevelopmental test results: child refusal, not able to perform test (e.g. cerebral palsy), test performed elsewhere with unknown result, no appointment at outpatient clinic, no show at outpatient clinic visit. IVH = intraventricular hemorrhage, PHVD = post hemorrhagic ventricular dilation, CC = corpus callosum, CCF = corpus callosum-fastigium, HC = head circumference, GA = gestational age, wk = weeks, NICU = neonatal intensive care unit, M = months corrected age, Bayley-III = Bayley Scales of Infant and Toddler Development-Third edition; CBCL = Child Behavior Checklist.

Supplemental Figure S2. Ultrasonic measurement of corpus callosum and corpus callosum-fastigium length.(1)

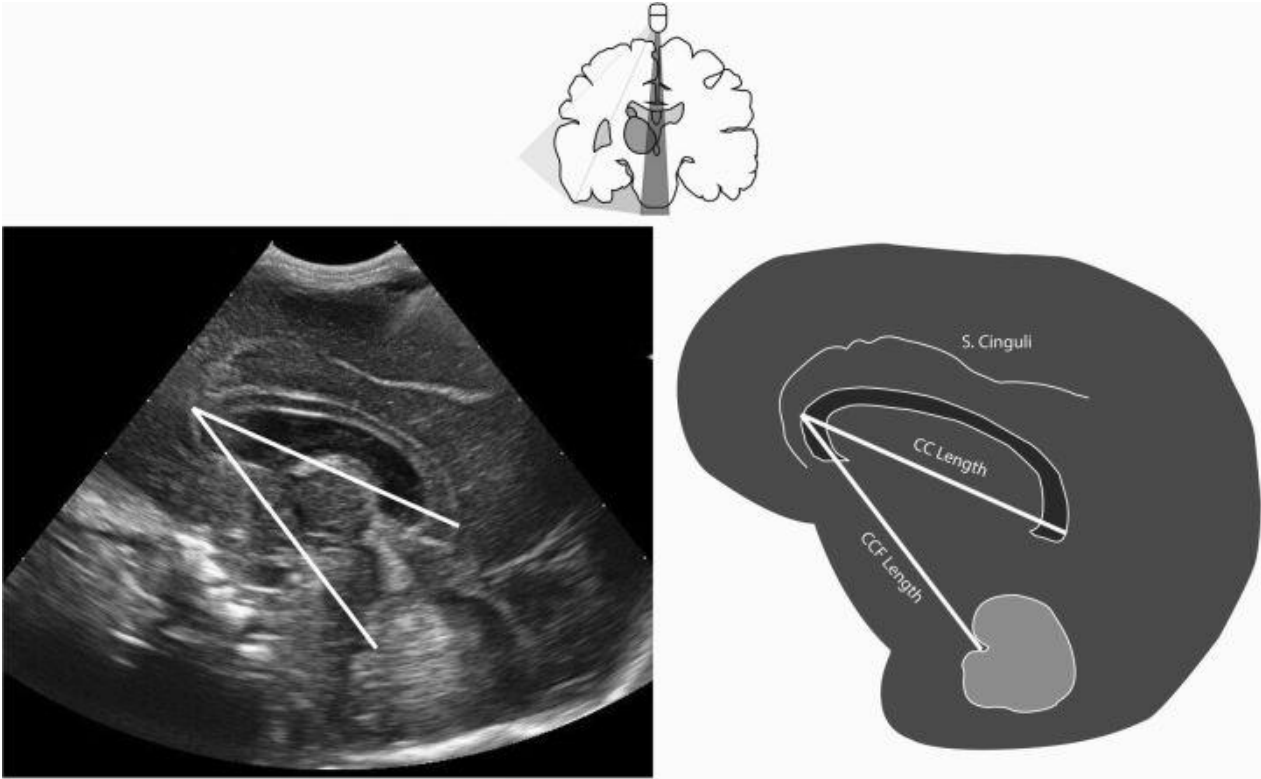

In the upper part, we show the coronal view of the brain and the position of the sonography probe for assessment of the corresponding correct sagittal plane below. Measurements of the corpus callosum–fastigium and corpus callosum length are displayed in the sagittal sonography view (*left*) and schematically (*right*). S. Cinguli indicates sulcus cinguli.(1)

Supplemental Figure S3. CC length, CCF length and HC by gestational age during NICU-stay.

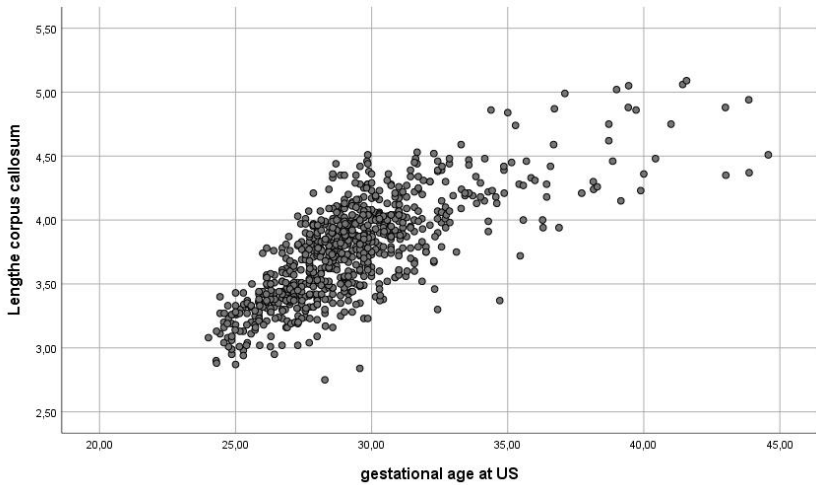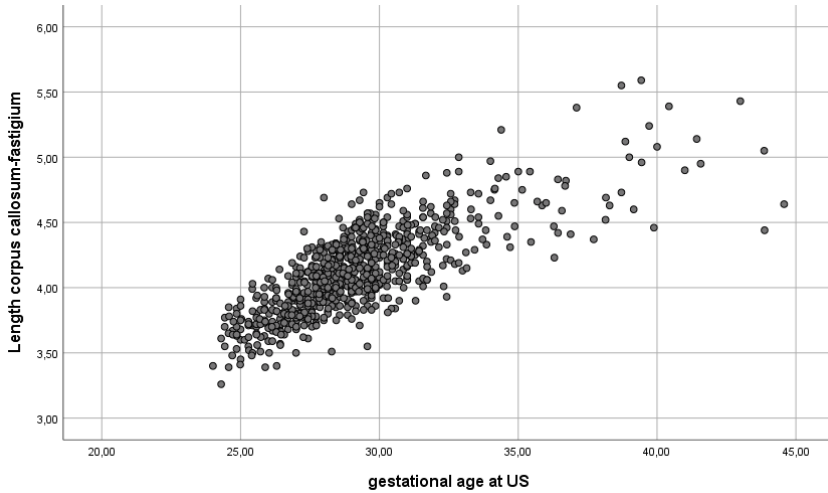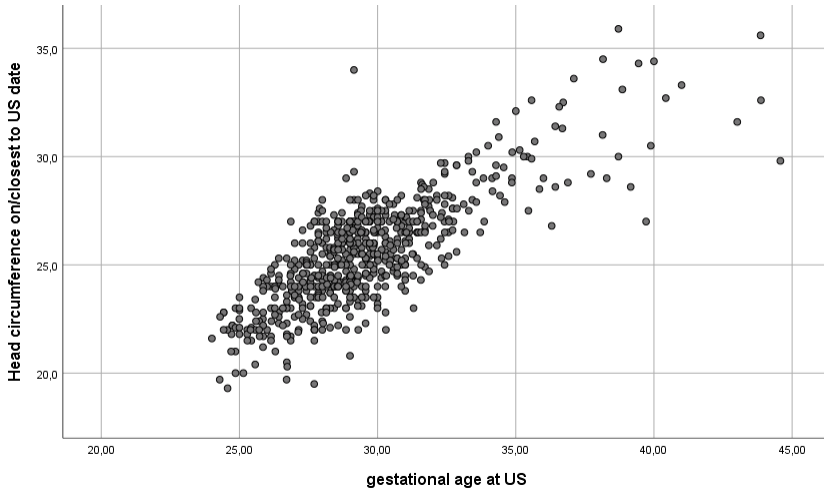

Graphs consist of 808 ultrasonic measurements for CC length (in cm), 779 ultrasonic measurements for CCF length (in cm), and 637 tape measurements of HC (in cm), respectively.

NICU = neonatal intensive care unit, CC = corpus callosum, CCF = corpus callosum-fastigium, HC = head circumference, US = ultrasound (cranial), cm = centimeters.



Supplemental Figure S4. CC length and CCF length by HC during NICU-stay.

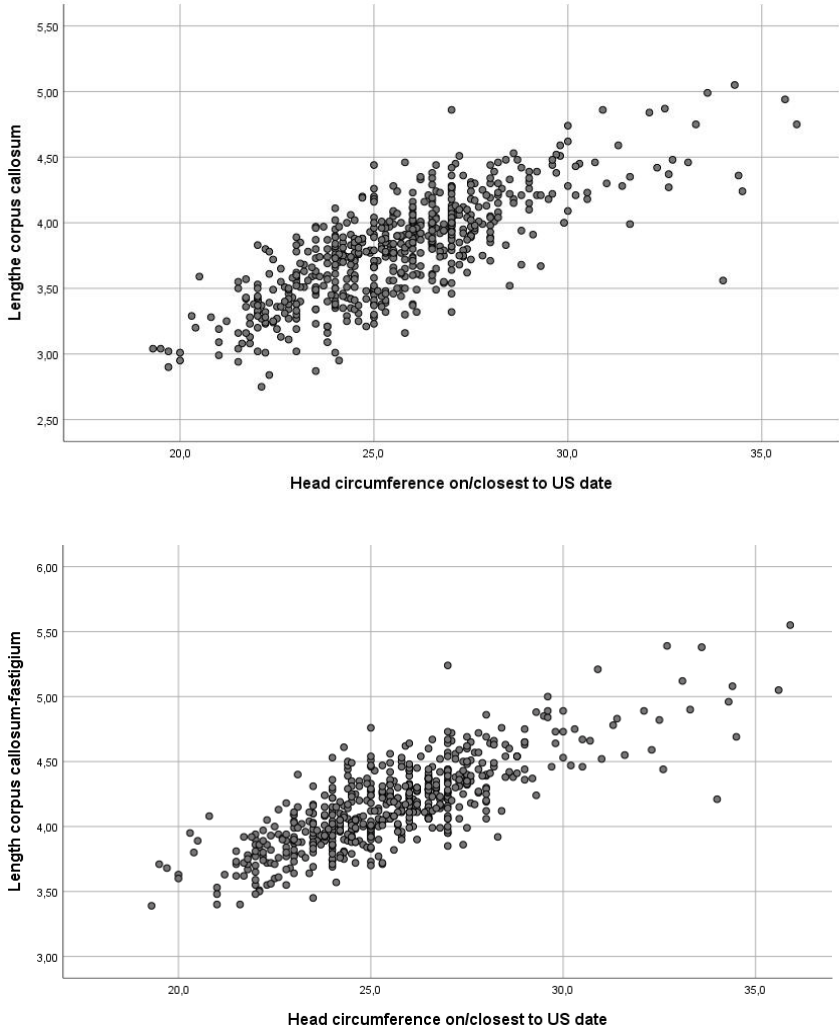

Graphs consist of all available ultrasonic measurements for CC length (in cm, graph 1) and CCF length (in cm, graph 2), and tape measurements of HC (in cm) on or closest to date of ultrasound, during NICU-stay. NICU = neonatal intensive care unit, CC = corpus callosum, CCF = corpus callosum-fastigium, HC = head circumference, cm = centimeters.

**Supplemental Table S5. Neurodevelopmental outcome at 2 years in children with and without brain injury.**

|                                            | <b>No injury (N=153)</b>      | <b>Any brain injury (N=72)</b> | <b>Relative risk</b> | <b>95%-CI</b>       | <b>p-value</b> |
|--------------------------------------------|-------------------------------|--------------------------------|----------------------|---------------------|----------------|
| Cerebral palsy, of which:                  | 5 (3%), unknown 1 (0.7%)      | 8 (11%)                        | <b>3.40</b>          | <b>1.15 - 10.03</b> | <b>0.03</b>    |
| - GMFCS I                                  | 5 (3%)                        | 7 (10%)                        |                      |                     |                |
| - GMFCS II                                 | 0 (0%)                        | 0 (0%)                         |                      |                     |                |
| - GMFCS III                                | 0 (0%)                        | 1 (1%)                         |                      |                     |                |
| Visual disorders,* of which:               | 8 (5%)                        | 8 (11%)                        | 2.13                 | 0.83 - 5.44         | 0.12           |
| - Wearing glasses                          | 6 (4%)                        | 8 (11%)                        |                      |                     |                |
| - Strabismus                               | 4 (3%)                        | 4 (6%)                         |                      |                     |                |
| - Nystagmus                                | 1 (0.7%)                      | 0 (0%)                         |                      |                     |                |
| Bayley-III cognitive score, of which:      | 100 [90;105], unknown 3 (2%)  | 96 [90;105], unknown 2 (3%)    |                      |                     |                |
| - Moderate / severe impairment (score <85) | 14 (9%)                       | 8 (11%)                        | 1.21                 | 0.53 - 2.76         | 0.64           |
| Bayley-III total motor score, of which:    | 98 [91;107], unknown 29 (19%) | 94 [89;102], unknown 15 (21%)  |                      |                     |                |
| - Moderate / severe impairment (score <85) | 8 (5%)                        | 10 (14%)                       | <b>2.66</b>          | <b>1.09 - 6.45</b>  | <b>0.03</b>    |
| Lexi test score, of which:                 | 91 [81;100], unknown 12 (8%)  | 88 [81;99], unknown 7 (10%)    |                      |                     |                |
| - Moderate / severe impairment (score <81) | 35 (23%)                      | 16 (22%)                       | 0.97                 | 0.58 - 1.64         | 0.91           |
| CBCL total score, of which:                | 45 [39;51], unknown 12 (8%)   | 50 [40;57], unknown 5 (7%)     |                      |                     |                |
| - Clinical problem behavior (score >63)    | 6 (4%)                        | 5 (7%)                         | 1.77                 | 0.56 - 5.56         | 0.33           |

Data are shown as median [interquartile range], absolute numbers (percentage) and relative risks with 95% confidence values and p-values (significant in **bold**). \* Numbers of wearing glasses, strabismus and nystagmus exceed total number of visual disorders as some children had multiple diagnoses.

N = number, CI = confidence interval, GMFCS = Gross Motor Function Classification System, Bayley-III = Bayley Scales of Infant and Toddler Development-Third edition; CBCL = Child Behavior Checklist.

Supplemental Table S6. Associations between length and growth of CC, CCF and HC, and neurodevelopmental outcomes at 2 years in children with brain injury (n=72)

| CC                               | Cognition |                     | Motor |                    | Language |                      | Behavior |                     |
|----------------------------------|-----------|---------------------|-------|--------------------|----------|----------------------|----------|---------------------|
|                                  | n         | B (CI)              | n     | B (CI)             | n        | B (CI)               | n        | B (CI)              |
| <b>Length (per 5 mm)</b>         |           |                     |       |                    |          |                      |          |                     |
| Birth                            | 50        | 2.66 (-5.52;10.83)  | 43    | 2.96 (-5.75;11.66) | 49       | 6.17 (-4.81;17.14)   | 50       | -1.20 (-7.93;5.52)  |
| GA 29wks                         | 49        | 2.73 (-4.52;9.98)   | 40    | 2.09 (-6.32;10.51) | 46       | -7.19 (-17.46;3.08)  | 48       | 1.43 (-5.09;7.96)   |
| NICU-transfer                    | 34        | NA                  | 32    | NA                 | 34       | NA                   | 34       | NA                  |
| 2M-visit                         | 28        | NA                  | 21    | NA                 | 26       | NA                   | 27       | NA                  |
| <b>Growth (per 0.25 mm/wk)</b>   |           |                     |       |                    |          |                      |          |                     |
| Birth-NICU transfer              | 39        | NA                  | 34    | NA                 | 37       | NA                   | 39       | NA                  |
| Birth-2M                         | 27        | NA                  | 20    | NA                 | 25       | NA                   | 26       | NA                  |
| CCF                              | Cognition |                     | Motor |                    | Language |                      | Behavior |                     |
|                                  | n         | B (CI)              | n     | B (CI)             | n        | B (CI)               | n        | B (CI)              |
| <b>Length (per 5 mm)</b>         |           |                     |       |                    |          |                      |          |                     |
| Birth                            | 48        | -1.67 (-12.23;8.88) | 42    | 3.36 (-7.74;14.46) | 48       | -0.29 (-14.44;13.87) | 48       | -6.58 (-14.99;1.84) |
| GA 29wks                         | 51        | 3.77 (-5.52;13.06)  | 42    | 9.43 (-0.59;19.44) | 48       | 0.42 (-12.67;13.51)  | 50       | -6.15 (-13.88;1.58) |
| NICU-transfer                    | 32        | NA                  | 31    | NA                 | 32       | NA                   | 32       | NA                  |
| 2M-visit                         | 27        | NA                  | 21    | NA                 | 26       | NA                   | 26       | NA                  |
| <b>Growth (per 0.25 mm/wk)</b>   |           |                     |       |                    |          |                      |          |                     |
| Birth-NICU transfer              | 31        | NA                  | 30    | NA                 | 31       | NA                   | 31       | NA                  |
| Birth-2M                         | 24        | NA                  | 18    | NA                 | 23       | NA                   | 23       | NA                  |
| HC                               | Cognition |                     | Motor |                    | Language |                      | Behavior |                     |
|                                  | n         | B (CI)              | n     | B (CI)             | n        | B (CI)               | n        | B (CI)              |
| <b>Circumference (per 20 mm)</b> |           |                     |       |                    |          |                      |          |                     |
| Birth                            | 65        | 6.12 (-0.08;12.32)  | 53    | 3.60 (-3.67;10.87) | 61       | 5.56 (-3.46;14.58)   | 63       | -1.13 (-7.20;4.95)  |
| GA 29wks                         | 50        | 1.16 (-5.33;7.64)   | 41    | 2.87 (-4.19;9.93)  | 47       | -2.95 (-12.04;6.14)  | 49       | 0.10 (-5.46;5.66)   |
| NICU-transfer                    | 32        | NA                  | 30    | NA                 | 32       | NA                   | 32       | NA                  |
| 2M-visit                         | 27        | NA                  | 21    | NA                 | 26       | NA                   | 27       | NA                  |
| <b>Growth (per 1 mm/wk)</b>      |           |                     |       |                    |          |                      |          |                     |
| Birth-NICU transfer              | 30        | NA                  | 29    | NA                 | 30       | NA                   | 30       | NA                  |
| Birth-2M                         | 27        | NA                  | 20    | NA                 | 25       | NA                   | 26       | NA                  |

Beta-coefficients (B) are shown per interquartile range of each marker, followed by 95% confidence intervals (CI). To avoid type I or II error in subgroups too small for the number of covariates in the model, analyses were only performed when the number of patients/ultrasounds was 40 or higher. Significant associations are depicted in **bold**. We used the cognitive and total motor score of the Bayley Scales of Infant and Toddler Development-Third edition (for cognition and motor outcome, respectively), Lexi-list

(language) and total score of the Child Behavior Checklist (behavior). Models were adjusted for sex (female 0, male 1), gestational age at birth (weeks), birth weight Z-score and combined parental education (low/middle/high). Apart from these four covariates, the GA29wks and 2M-visit models were also adjusted for gestational age or corrected age at measurement, respectively. Results from similar analyses on infants with brain injury are shown in supplemental Table 3.

CC = corpus callosum, n = number of patients/ultrasounds included, GA = gestational age, NICU = neonatal intensive care, NA = not applicable, M = months, CCF = corpus callosum-fastigium, HC = head circumference.

Supplemental Table S7. Associations between length and growth of CC, CCF and HC, and neurodevelopmental outcomes at 2 years in children without brain injury (n=153, basic model).

| CC                               | Cognition |                         | Motor |                         | Language |                          | Behavior |                    |
|----------------------------------|-----------|-------------------------|-------|-------------------------|----------|--------------------------|----------|--------------------|
|                                  | n         | B (CI)                  | n     | B (CI)                  | n        | B (CI)                   | n        | B (CI)             |
| <b>Length (per 5 mm)</b>         |           |                         |       |                         |          |                          |          |                    |
| Birth                            | 113       | -0.45 (-5.2;4.30)       | 96    | 3.90 (-0.72;8.51)       | 106      | 2.31 (-3.75;8.37)        | 105      | -0.71 (-4.63;3.21) |
| GA 29wks                         | 124       | 1.90 (-2.04;5.83)       | 101   | 3.06 (-0.95;7.07)       | 118      | 2.81 (-2.48;8.10)        | 119      | -1.64 (-4.87;1.59) |
| NICU-transfer                    | 80        | 1.26 (-4.52;7.05)       | 68    | 1.78 (-3.32;6.88)       | 77       | 0.49 (-6.13;7.11)        | 76       | -1.42 (-5.53;2.69) |
| 2M-visit                         | 70        | <b>5.64 (2.45;8.83)</b> | 62    | <b>4.16 (1.00;7.32)</b> | 70       | <b>6.26 (2.04;10.48)</b> | 70       | -2.05 (-4.59;0.50) |
| <b>Growth (per 0.25 mm/wk)</b>   |           |                         |       |                         |          |                          |          |                    |
| Birth-NICU transfer              | 75        | 0.04 (-1.48;1.56)       | 61    | -0.94 (-2.46;0.57)      | 70       | -0.05 (-2.09;1.98)       | 71       | -0.78 (-1.97;0.41) |
| Birth-2M                         | 63        | <b>5.40 (1.01;9.79)</b> | 56    | <b>4.58 (0.34;8.83)</b> | 63       | 4.39 (-1.45;10.23)       | 63       | -2.71 (-4.92;1.23) |
| CCF                              | Cognition |                         | Motor |                         | Language |                          | Behavior |                    |
|                                  | n         | B (CI)                  | n     | B (CI)                  | n        | B (CI)                   | n        | B (CI)             |
| <b>Length (per 5 mm)</b>         |           |                         |       |                         |          |                          |          |                    |
| Birth <sup>a</sup>               | 114       | -3.30 (-9.13;2.54)      | 97    | 1.54 (-4.24;7.32)       | 107      | -0.99 (-8.50;6.52)       | 106      | -1.35 (-6.19;3.50) |
| GA 29wks                         | 120       | -0.92 (-5.98;4.13)      | 98    | -2.47 (-7.68;2.73)      | 114      | -0.59 (-7.35;6.16)       | 115      | -1.88 (-6.05;2.30) |
| NICU-transfer <sup>a</sup>       | 76        | 1.02 (-6.20;8.24)       | 64    | -1.37 (-7.90;5.16)      | 74       | 3.08 (-5.14;11.30)       | 73       | -0.68 (-5.82;4.47) |
| 2M-visit <sup>b</sup>            | 68        | 5.66 (-0.71;12.03)      | 60    | -0.93 (-7.21;5.35)      | 68       | 7.13 (-1.11;15.36)       | 68       | -1.99 (-6.84;2.85) |
| <b>Growth (per 0.25 mm/wk)</b>   |           |                         |       |                         |          |                          |          |                    |
| Birth-NICU transfer              | 73        | -0.84 (2.36;0.67)       | 58    | -0.50 (-2.05;1.06)      | 68       | -0.08 (-2.13;1.97)       | 69       | 0.65 (-0.55;1.86)  |
| Birth-2M                         | 55        | 3.39 (-2.56;9.33)       | 52    | 0.96 (-4.85;6.67)       | 59       | 5.14 (-2.51;12.79)       | 59       | -2.35 (-6.94;2.25) |
| HC                               | Cognition |                         | Motor |                         | Language |                          | Behavior |                    |
|                                  | n         | B (CI)                  | n     | B (CI)                  | n        | B (CI)                   | n        | B (CI)             |
| <b>Circumference (per 20 mm)</b> |           |                         |       |                         |          |                          |          |                    |
| Birth <sup>a</sup>               | 147       | -0.17 (-3.19;2.84)      | 121   | -0.15 (-3.27;2.98)      | 138      | -0.16 (-4.31;3.99)       | 138      | -0.73 (-3.20;1.73) |
| GA 29wks                         | 116       | -1.33 (-3.69;1.02)      | 95    | -1.13 (-3.59;1.32)      | 109      | -1.94 (-5.19;1.32)       | 111      | -1.33 (-3.27;0.62) |
| NICU-transfer <sup>a</sup>       | 80        | 2.66 (-1.65;6.98)       | 67    | 0.31 (-3.63;4.25)       | 77       | 0.14 (-4.82;5.10)        | 76       | -1.73 (-4.75;1.29) |
| 2M-visit <sup>b</sup>            | 67        | 2.68 (-0.95;6.32)       | 60    | 1.15 (-2.37;4.67)       | 68       | <b>5.33 (0.78;9.87)</b>  | 68       | -0.85 (-3.58;1.88) |
| <b>Growth (per 1 mm/wk)</b>      |           |                         |       |                         |          |                          |          |                    |
| Birth-NICU transfer              | 70        | 0.08 (-1.00;1.15)       | 55    | 0.08 (-1.01;1.17)       | 66       | -0.18 (-1.60;1.24)       | 66       | -0.39 (-1.23;0.46) |
| Birth-2M                         | 66        | 1.83 (-1.82;5.47)       | 59    | 0.99 (-2.53;4.50)       | 67       | <b>5.71 (1.22;10.20)</b> | 67       | -1.58 (-4.37;1.20) |

Beta-coefficients (B) are shown per interquartile range of each marker, followed by 95% confidence intervals (CI). We used the cognitive and total motor score of the Bayley Scales of Infant and Toddler Development-Third edition (for cognition and motor outcome, respectively), Lexi-test (language) and total score of the Child Behavior Checklist (behavior). <sup>a</sup>Adjusted for GA at ultrasound, <sup>b</sup>adjusted for corrected age at ultrasound. Significant associations are depicted in **bold**.

CC = corpus callosum, n = number of patients/ultrasounds included, GA = gestational age, NICU = neonatal intensive care, M = months, CCF = corpus callosum-fastigium, HC = head circumference.

Supplemental Table S8. Associations between length and growth of CC, CCF and HC, and neurodevelopmental outcomes at 2 years in children with brain injury (n=72, basic model).

| CC                               | Cognition |                    | Motor |                           | Language |                     | Behavior |                             |
|----------------------------------|-----------|--------------------|-------|---------------------------|----------|---------------------|----------|-----------------------------|
|                                  | n         | B (CI)             | n     | B (CI)                    | n        | B (CI)              | n        | B (CI)                      |
| <b>Length (per 5 mm)</b>         |           |                    |       |                           |          |                     |          |                             |
| Birth                            | 51        | 1.35 (-5.86;8.56)  | 44    | 3.64 (-3.82;11.10)        | 49       | 6.11 (-3.32;15.53)  | 51       | -2.29 (-8.16;3.58)          |
| GA 29wks                         | 52        | 3.20 (-3.73;10.12) | 43    | 2.12 (-5.91;10.15)        | 48       | -2.81 (-12.25;6.64) | 50       | 1.60 (-4.66;7.86)           |
| NICU-transfer                    | 38        | NA                 | 35    | NA                        | 37       | NA                  | 37       | NA                          |
| 2M-visit                         | 28        | NA                 | 21    | NA                        | 26       | NA                  | 27       | NA                          |
| <b>Growth (per 0.25 mm/wk)</b>   |           |                    |       |                           |          |                     |          |                             |
| Birth-NICU transfer              | 39        | NA                 | 34    | NA                        | 37       | NA                  | 39       | NA                          |
| Birth-2M                         | 27        | NA                 | 20    | NA                        | 25       | NA                  | 26       | NA                          |
| CCF                              | Cognition |                    | Motor |                           | Language |                     | Behavior |                             |
|                                  | n         | B (CI)             | n     | B (CI)                    | n        | B (CI)              | n        | B (CI)                      |
| <b>Length (per 5 mm)</b>         |           |                    |       |                           |          |                     |          |                             |
| Birth <sup>a</sup>               | 51        | 0.43 (-9.39;10.26) | 42    | 5.94 (-4.43;16.31)        | 49       | 2.81 (-10.23;15.84) | 50       | <b>-8.39 (-16.14;-0.65)</b> |
| GA 29wks                         | 56        | 4.77 (-4.17;13.71) | 46    | <b>10.77 (1.04;20.50)</b> | 52       | 3.38 (-8.73;15.50)  | 54       | -6.02 (-13.90;1.87)         |
| NICU-transfer <sup>a</sup>       | 36        | NA                 | 34    | NA                        | 35       | NA                  | 35       | NA                          |
| 2M-visit <sup>b</sup>            | 27        | NA                 | 21    | NA                        | 26       | NA                  | 26       | NA                          |
| <b>Growth (per 0.25 mm/wk)</b>   |           |                    |       |                           |          |                     |          |                             |
| Birth-NICU transfer              | 33        | NA                 | 30    | NA                        | 32       | NA                  | 33       | NA                          |
| Birth-2M                         | 24        | NA                 | 18    | NA                        | 23       | NA                  | 23       | NA                          |
| HC                               | Cognition |                    | Motor |                           | Language |                     | Behavior |                             |
|                                  | n         | B (CI)             | n     | B (CI)                    | n        | B (CI)              | n        | B (CI)                      |
| <b>Circumference (per 20 mm)</b> |           |                    |       |                           |          |                     |          |                             |
| Birth <sup>a</sup>               | 69        | 4.50 (-1.58;3.44)  | 56    | 4.61 (-0.74;9.96)         | 64       | 5.81 (-0.54;12.17)  | 66       | -2.71 (-7.03;1.60)          |
| GA 29wks                         | 54        | 3.18 (-1.08;7.45)  | 44    | 4.04 (-0.72;8.81)         | 50       | 3.28 (-2.45;9.01)   | 52       | 1.02 (-2.66;4.70)           |
| NICU-transfer <sup>a</sup>       | 34        | NA                 | 31    | NA                        | 34       | NA                  | 34       | NA                          |
| 2M-visit <sup>b</sup>            | 27        | NA                 | 21    | NA                        | 26       | NA                  | 27       | NA                          |
| <b>Growth (per 1 mm/wk)</b>      |           |                    |       |                           |          |                     |          |                             |
| Birth-NICU transfer              | 32        | NA                 | 29    | NA                        | 32       | NA                  | 32       | NA                          |
| Birth-2M                         | 27        | NA                 | 20    | NA                        | 25       | NA                  | 26       | NA                          |

Beta-coefficients (B) are shown per interquartile range of each marker, followed by 95% confidence intervals (CI). We used the cognitive and total motor score of the Bayley Scales of Infant and Toddler Development-Third edition (for cognition and motor outcome, respectively), Lexi-test (language) and total score of the Child Behavior Checklist (behavior). <sup>a</sup>Adjusted for GA at ultrasound, <sup>b</sup>adjusted for corrected age at ultrasound. Significant associations are depicted in **bold**.

CC = corpus callosum, n = number of patients/ultrasounds included, GA = gestational age, NICU = neonatal intensive care, NA = not applicable, M = months, CCF = corpus callosum-fastigium, HC = head circumference.



## REFERENCES

1. Roelants JA, Koning IV, Raets MM, Willemsen SP, Lequin MH, Steegers-Theunissen RP, et al. A New Ultrasound Marker for Bedside Monitoring of Preterm Brain Growth. *AJNR Am J Neuroradiol.* 2016;37(8):1516-22.
